# Supplementary material for: Assessment of whole gut motility in adolescents using the wireless motility capsule test
Source: PubMed Central journal article supplement (PMC8897340; doi:10.1007/s00431-021-04295-6), 2021-11-17

## Supplemental Figure 1

a: Capsule dimensions and technical content

b: Flowchart of the standardised test procedure for performing a wireless motility capsule test

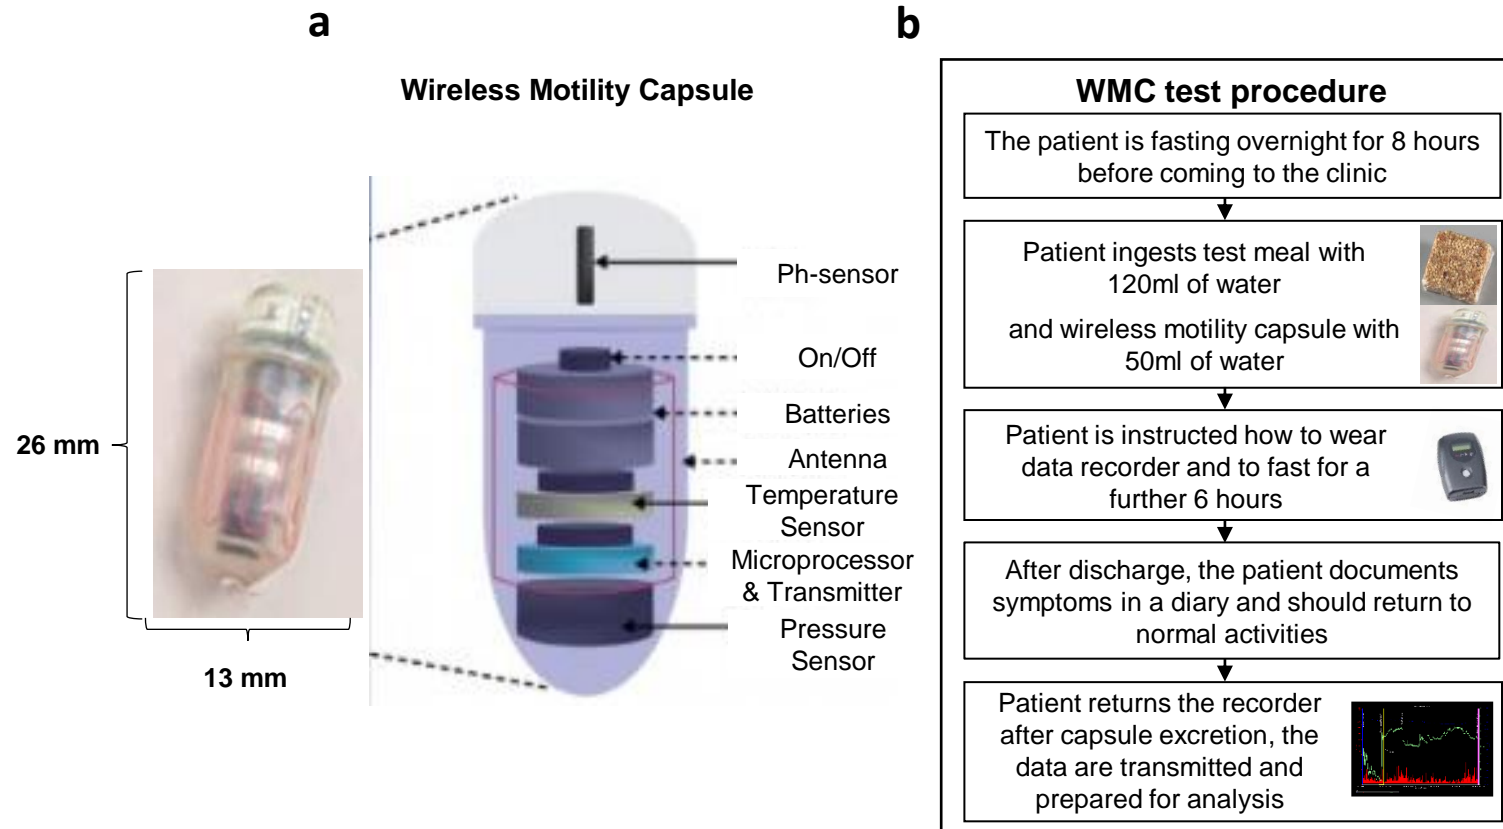

Supplement: 431_2021_4295_MOESM1_ESM.pdf [file 431_2021_4295_MOESM1_ESM.pdf]
